# Supplementary material
Source: publisher figshare collection journal article supplement (https://acs.figshare.com/ndownloader/files/15061073)
Supplement: Supplementary file 1 [file 15061073]

## Supporting Information

### Allosteric modulation mechanism of the mGluR<sub>5</sub> transmembrane domain

Xiaojing Cong,<sup>1\*</sup> Jean-Baptiste Cheron,<sup>1</sup> Jérôme Golebiowski,<sup>1,2</sup> Serge Antonczak<sup>1</sup> and Sébastien Fiorucci<sup>1\*</sup>

<sup>1</sup> Université Côte d'Azur, CNRS, Institut de Chimie de Nice UMR7272, Nice 06108, France

<sup>2</sup> Department of Brain and Cognitive Sciences, Daegu Gyeongbuk Institute of Science and Technology, Daegu 711-873, South Korea

\* To whom correspondence may be addressed: [xiaojing.cong@unice.fr](mailto:xiaojing.cong@unice.fr) or [sebastien.fiorucci@unice.fr](mailto:sebastien.fiorucci@unice.fr)

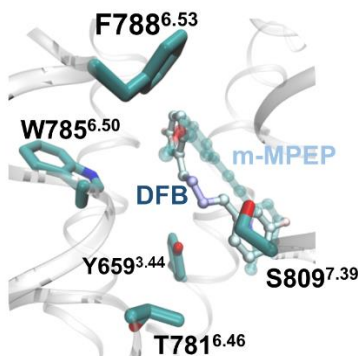

**Figure S1.** Initial binding mode of DFB obtained from docking. The position of m-MPEP is also shown (transparent) for comparison.

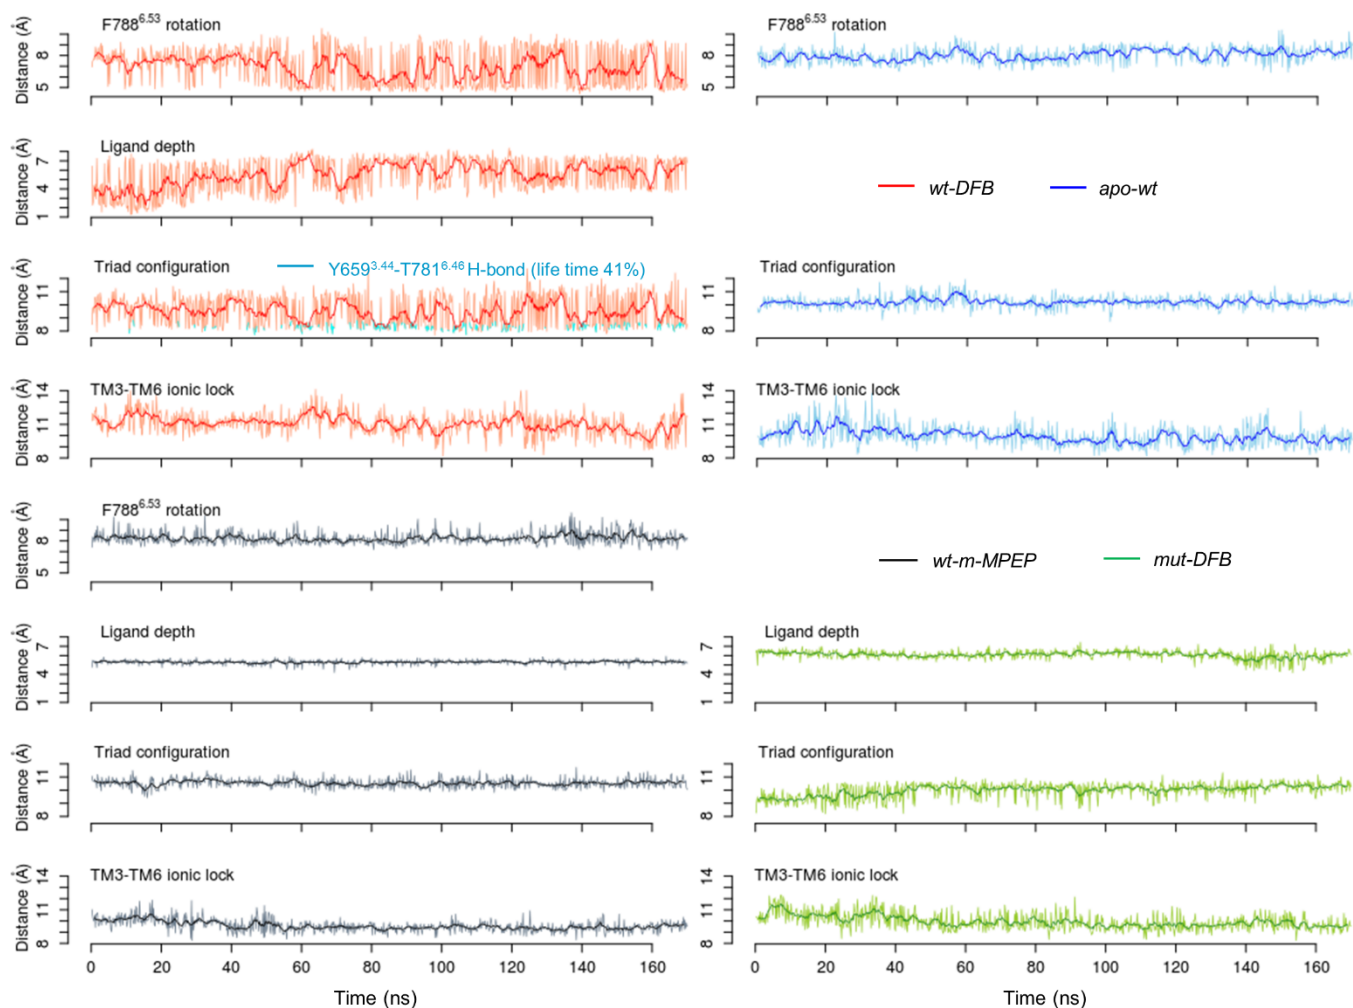

**Figure S2.** Time series plots of the rotation of F788<sup>6.53</sup> (as measured by the distance between F788<sup>6.53</sup> side chain and V806<sup>7.36</sup> C $\alpha$ ), the ligand binding modes (as measured by the center-of-mass distance between the ligand and the triad C $\alpha$  atoms), the triad configuration (as measured by the T781<sup>6.46</sup>-Y659<sup>3.44</sup> C $\alpha$  distance), and the TM3-TM6 ionic lock (as measured by the K665<sup>3.50</sup>-E770<sup>6.35</sup> C $\alpha$  distance). *wt-DFB* exhibited strong correlations between the F788<sup>6.53</sup> rotation, the alternation of the PAM binding mode and the reconfiguration of the triad, which were loosely coupled to the destabilization of the TM3-TM6 ionic lock. The reconfiguration of the triad also involved a new H-bond between T781<sup>6.46</sup> backbone and Y659<sup>3.44</sup> side chain (cyan).

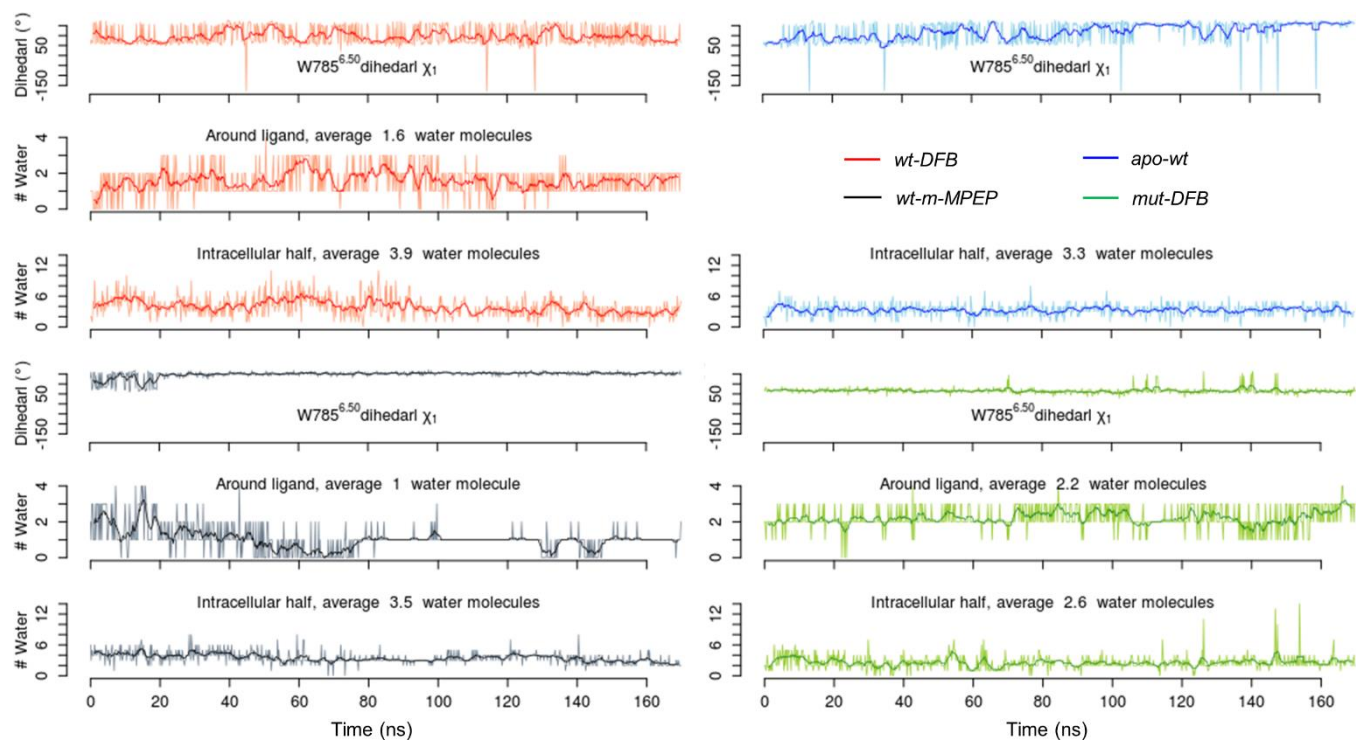

**Figure S3.** Time series plots showing correlations between the W785<sup>6.50</sup> dihedral angle  $\chi_1$  and the number of water molecules within the AM-pocket, which were loosely coupled to the hydration within the intracellular half of the 7TM.

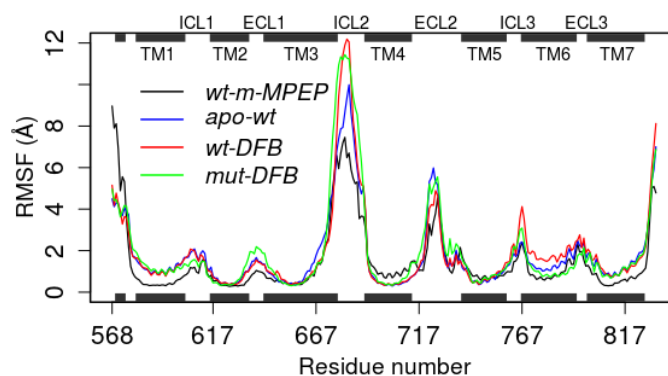

**Figure S4.** C $\alpha$  RMSF of the four systems during the 170 ns of simulations.

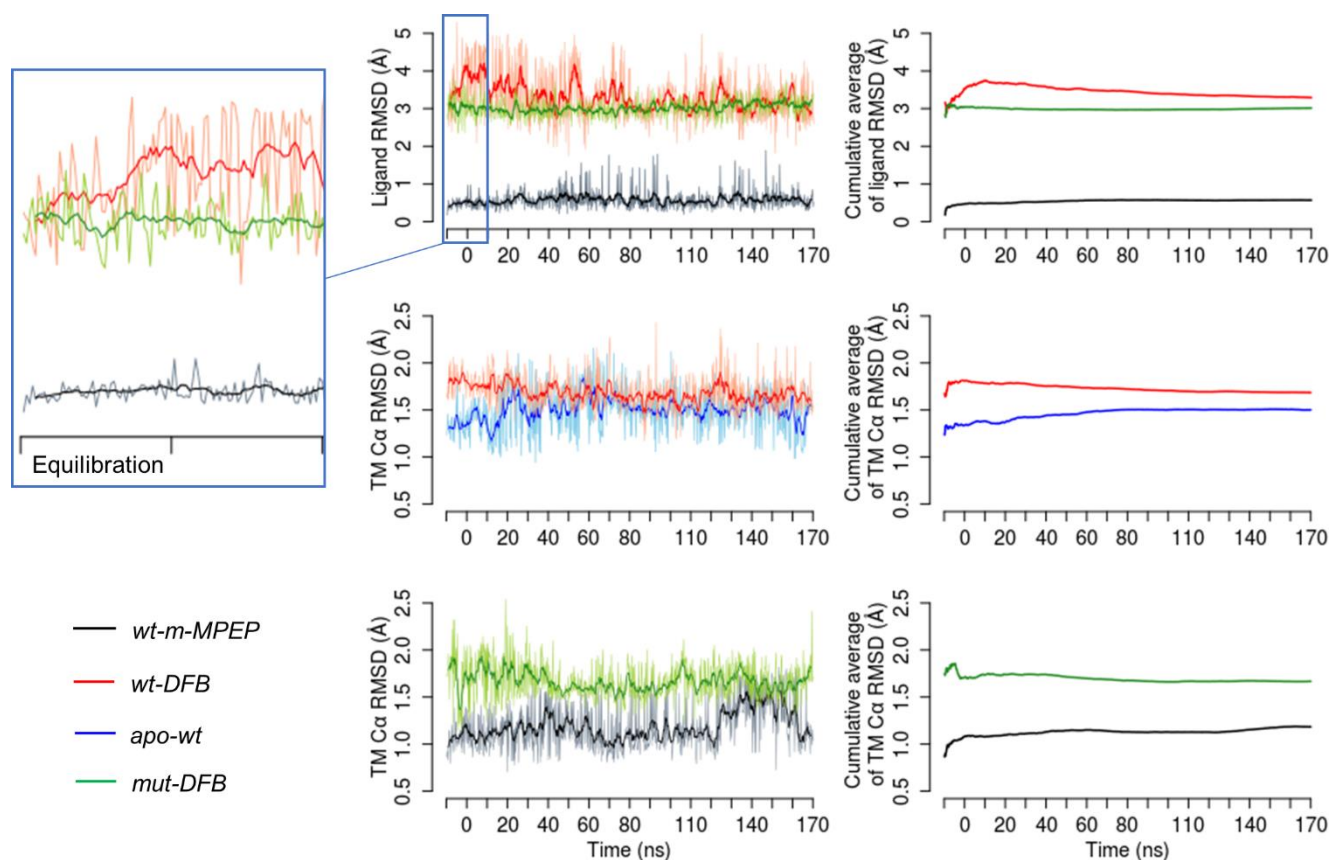

**Figure S5. (Left)** RMSD of the ligand heavy atoms and the TM domain Cα atoms during the equilibration and the production phases with respect to the initial structures. **(Right)** Cumulative average of the RMSDs showing convergence of the simulations.

**Table S1.** Number of contacts<sup>a</sup> between the intracellular loops, averaged over each simulation trajectory

|                  | ICL1-ICL2 | ICL1-ICL3 | ICL2-ICL3 | ECL1-ECL2 | ECL1-ECL3 | ECL2-ECL3 |
|------------------|-----------|-----------|-----------|-----------|-----------|-----------|
| <i>apo-wt</i>    | 1±3       | 28±8      | 4±8       | 73±21     | 0         | 1±2       |
| <i>wt-m-MPEP</i> | 0         | 32±6      | 5±10      | 59±8      | 0         | 3±5       |
| <i>wt-DFB</i>    | 1±5       | 18±14     | 7±19      | 67±17     | 0         | 1±2       |
| <i>mut-DFB</i>   | 2±8       | 25±13     | 22±23     | 31±7      | 0         | 1±2       |

<sup>a</sup> Within 6 Å of distance. Multiple contacts with the same atom within one simulation frame were counted only once.

## Supplementary Methods

VMD<sup>1</sup> was used to embed the 7TM models in a bilayer of POPC lipids. The system was solvated in a periodic  $94 \times 96 \times 110 \text{ Å}^3$  periodic box of explicit water and neutralized with Cl<sup>-</sup> ions. The final simulation systems consisted of ~63,000 atoms each, including ~12,800 water molecules, 154 POPC and 15 Cl<sup>-</sup> ions.

Two cycles of energy minimization (5,000 steps of steepest descent and 5,000 steps of conjugate gradient) were performed. During the first cycle, 200 kcal·mol<sup>-1</sup>·Å<sup>-2</sup> positional restraints were applied on the protein (and the ligand when present). The system was then gradually heated to 310 K during 1 ns, with 200 kcal·mol<sup>-1</sup>·Å<sup>-1</sup> restraints on the protein atoms (and the ligand when present). Bonds involving hydrogen atoms were constrained using the LINCS algorithm, allowing for a 2-fs time step. Van der Waals and short-range electrostatic interactions were cut off at 8 Å. Long-range electrostatic interactions were computed using Particle Mesh Ewald summation (PME). Two phases of 5-ns equilibration were performed in the *NPT*-ensemble ( $P = 1$  bar,  $T = 310$  K), with then without 15 kcal·mol<sup>-1</sup>·Å<sup>-1</sup> restraints on the protein and the ligand. Semi-isotropic pressure coupling was applied using the Andersen-Parrinello-Rahman barostat <sup>2,3</sup>, allowing the simulation box in the *z*-axis (perpendicular to the lipid bilayer) to vary independently of the *x-y* plane. Temperature coupling was realized using the Nose-Hoover thermostat <sup>4</sup>.

## Supporting references

1. Humphrey, W.; Dalke, A.; Schulten, K., Vmd: Visual Molecular Dynamics. *J Mol Graph* **1996**, 14, 33-8, 27-8.
2. Parrinello, M.; Rahman, A., Polymorphic Transitions in Single Crystals: A New Molecular Dynamics Method. *J Appl Phys* **1981**, 52, 7182-7190.
3. Andersen, H. C., Molecular Dynamics Simulations at Constant Pressure and/or Temperature. *J Chem Phys* **1980**, 72, 2384-2393.
4. Nosé, S.; Klein, M. L., Constant Pressure Molecular Dynamics for Molecular Systems. *Mol Phys* **1983**, 50, 1055-1076.
